# Supplementary material
Source: PubMed Central journal article supplement (PMC11386544)

# Supplementary Information

## Methods S1

The *CrBKT* (AY860820.1) found within the genome of *C. reinhardtii* was synthetically redesigned with codon optimization and intron spreading as recently described (Baier et al., 2018b). The synthetic optimized *CrBKT* gene coding sequence (CDS) was deprived of the last 345 bp and a small region was added to make a C-terminal GSG-linker prior to optimization and the synthetic gene produced by GeneArt (Germany). The synthetic *CrBKT* sequence was cloned between *Bam*HI-*Bg*III into the pOpt2\_PsaD\_mVenus\_Paro vector (Wichmann et al., 2018) to generate a protein which contains the *C. reinhardtii* photosystem I reaction centre subunit II (PsaD) chloroplast targeting peptide and a C-terminal mVenus (YFP) fusion. The empty vector served as a control. The vector confers resistance to paromomycin from a second *aphVIII* expression cassette (Lauersen et al., 2015). Variations on this construct were generated by successive cloning within the pOpt2\_PsaD\_CrBKT\_YFP\_Paro vector. The *CrBKT* was cloned into the same vector but without PsaD target peptide in order to obtain a *CrBKT* protein targeted with endogenous transit peptide. To test the C-terminal amino acid extension, the whole protein was generated by PCR fusion of a 345 bp region to its C-terminus. First, the C-terminal region was chemically synthesized including last 30 bp of BKT previously generated in order to allow primer binding. Then two different fragments were amplified: one containing BKT sequence using pOpt2\_PsaD\_BKT\_YFP as template (primer: for: 5'-GGCCGGATCCGGCCCCGGCATCCAGCCCACCAGCG-3', rev: 5'-CCGCGGTTCGCGGCAGCCGCGGGCAGGGGCGGGGGCCAGGGCGGGCGCCGCGGGCGATC-3') while the second contained the BKT C-terminal region using synthetic sequence as template (primer for: 5'-GATCGCCCCGCGGGCGCCGCCCTG-3', rev: 5'-GGCCAGATCTGCCGCTGCCGGCCATCACGCCACGGGGGCGCCAGC-3'). The two fragments were then used as template for an additional amplification to fuse these elements using additional primers for: 5'-GGCCGGATCCGGCCCCGGCATCCAGCCCACCAGCG-3' and rev: 5'-GGCCAGATCTGCCGCTGCCGGCCATCACGCCACGGGGGCGCCAGC-3'. The amplified sequence was cloned into pOpt2\_PsaD\_BKT\_YFP\_Paro in the *Bam*HI-*Bg*III position.

pOpt2\_PsaD\_BKT without YFP was generated by removing YFP sequence using *Zra*I and *Eco*RV enzymes from pOpt2\_PsaD\_BKT\_YFP. pOpt\_PsaD\_BKT2x\_YFP was generated by first PCR amplification of BKT sequence to remove the 5' 150 nucleotides coding for the N-terminal targeting peptide using pOpt2\_PsaD\_BKT\_YFP\_Paro as template (primer: for 5'-GGCCGGATCCAAGCTGTGGCAGCGCCAGTACCACCTG-3', rev: 5'-GGCCAGATCTGCCGCTGCCGGCCATCACGCCACGGGGGCGCCAGC-3'). This sequence was inserted into a pOpt2 vector generating pOpt2\_PsaD\_-50aaBKT\_YFP which could then be combined with the pOpt2\_PsaD\_BKT\_YFP\_Paro vector by compatible *Bam*HI-*Bg*III overhangs to generate the pOpt2\_PsaD\_2xBKT\_YFP\_Paro. For subcellular localization determination mediated of the BKT N-terminal chloroplast targeting peptide, 102 and 120 bp from the 5' region of the BKT coding for its N-terminus was amplified and cloned into *Nde*I-*Bg*III sites of the pOpt2\_PsaD\_BKT\_YFP\_Paro (primer for: 5'-GGCCGGATCCGGCCCCGGCATCCAGCCCACCAGCG-3' rev:amino acid 34 for 102bp and rev:amino acid 40 for 120bp).

All cloning described here was performed using FastDigest restriction enzymes (Thermo Scientific) and the Rapid DNA Dephos & Ligation Kit (Roche) following manufacturer's instructions. PCR was conducted using Q5® High Fidelity DNAPolymerase (NEB). DNA fragments were separated in 2% (w/v) agarose gels and purified using the peqGOLD Gel Extraction Kit (VWR). Heat-shock transformation of chemically competent *Escherichia coli* DH5α cells was performed for all vectors followed by selection on LB-agar plates with ampicillin as a selection marker. Colonies were evaluated by colony PCR followed by plasmid isolation from overnight culture using peqGOLD

Plasmid Miniprep Kit I (VWR). All sequences were confirmed by Sanger sequencing (Sequencing Core Facility, CeBiTec, Bielefeld University).

**Table S1. Percentage of colonies with visible phenotype upon transformation with *bkt* expression vectors.** The percentage of colonies on plates with visible phenotype upon transformation with the different expression vectors carrying *bkt* gene was calculated from the ratio between brown/green colonies among the colonies surviving the antibiotic selection. Negative control with expression vectors carrying *yfp* gene only are reported. Errors are reported as standard deviations.

|             | <b>vector</b>   | <b>altered colour/total</b> |
|-------------|-----------------|-----------------------------|
| <b>UVM4</b> | PsaD_YFP        | 0.00%<br>±<br>0%            |
|             | PsaD_BKT_YFP    | 16.40%<br>±<br>0.80%        |
|             | PsaD_BKT_Ct_YFP | 14.50%<br>±<br>3.50%        |
|             | PsaD_BKT        | 13.30%<br>±<br>9.20%        |
|             | BKT_YFP         | 17.70%<br>±<br>6.50%        |
|             | PsaD_BKT2x_YFP  | 16.00%<br>±<br>12.00%       |
| <b>npq2</b> | PsaD_YFP        | 0.00%<br>±<br>0%            |
|             | PsaD_BKT_YFP    | 17.95%<br>±<br>8%           |

**Table S2. Chromatographic, spectroscopic and mass properties of identified carotenoids.** First three columns indicate peak numbers, retention times (RT) and absorption peaks ( $\lambda$  max) of different carotenoids analysed by HPLC as shown in figure 3g. Single purified ketocarotenoids (indicated with \*) were further analysed by LC Mass spectroscopy. Retention times for LC-MS, m/z value (corresponding to  $[M+H]^+$  values), chemical formula generated and the difference between the theoretical and measured mass value ( $\Delta$  ppm) are reported.

|                               | HPLC peak | HPLC RT (min) | $\lambda$ max (nm) | LC-MS RT (min) | m/z   | chemical formula generated by LC-MS            | $\Delta$ (ppm) |
|-------------------------------|-----------|---------------|--------------------|----------------|-------|------------------------------------------------|----------------|
| neoxanthin                    | 1         | 4.83          | 415,438,466        | -              | -     | -                                              | -              |
| violaxanthin                  | 2         | 5.85          | 418,442,470        | -              | -     | -                                              | -              |
| *3S 3S' trans astaxanthin     | 8         | 6.35          | 478                | 1.60           | 597.4 | C <sub>40</sub> H <sub>52</sub> O <sub>4</sub> | 0.77           |
| *3S 3S' 9 cis astaxanthin     | 9         | 7.01          | 470                | 1.60           | 597.4 | C <sub>40</sub> H <sub>52</sub> O <sub>4</sub> | 0.52           |
| *3S 3S' 13 cis astaxanthin    | 10        | 7.48          | 371,468            | 1.60           | 597.4 | C <sub>40</sub> H <sub>52</sub> O <sub>4</sub> | 0.33           |
| lutein                        | 3         | 7.83          | 420,447,475        | -              | -     | -                                              | -              |
| *adonirubin (Phoenicoxanthin) | 11        | 8.09          | 474                | 2.02           | 581.4 | C <sub>40</sub> H <sub>52</sub> O <sub>3</sub> | -1.24          |
| *cantaxanthin                 | 12        | 8.52          | 476                | 2.42           | 565.4 | C <sub>40</sub> H <sub>53</sub> O <sub>2</sub> | 0.15           |
| $\beta$ carotene              | 6         | 13.35         | 428,455,478        | -              | -     | -                                              | -              |

**Figure S1. Western blot and immunodetection of BKT proteins fused with YFP.** Protein extracts from transformant lines, as reported on the top of figure, we loaded in SDS-PAGE gel. Proteins were separated by 12% Tris-glycine-SDS-PAGE. Separated proteins were stained using colloidal Coomassie Brilliant Blue G-250 or analyzed by immunodetection on nitrocellulose membranes using a HRP-linked rabbit-anti-GFP antibody (Thermo Scientific, A10260) and Pierce™ ECL Western Blotting substrates (Thermo Scientific). Coomassie staining is reported on the bottom of the figure as loading control.

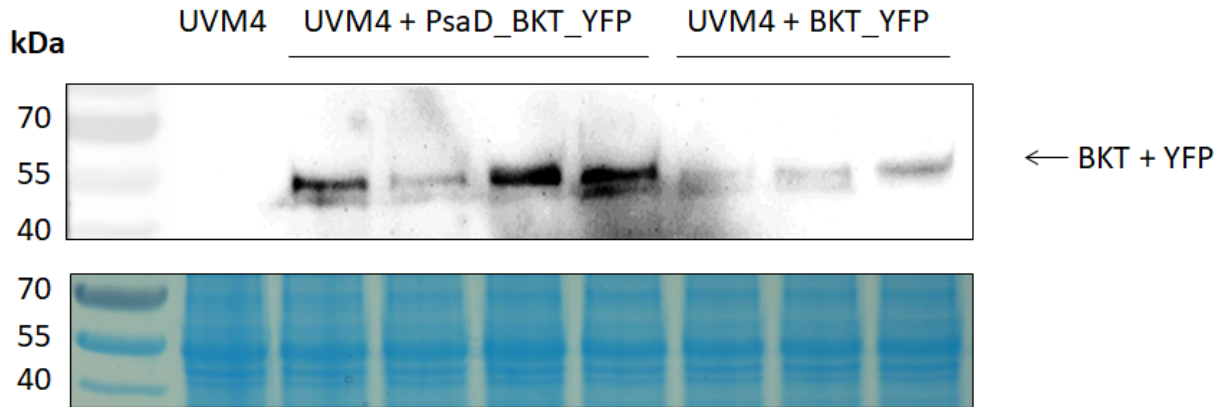

**Figure S2. Microscopy images of *H. lacustris* and *C. reinhardtii* BKT overexpressing strain (*bkt5*).** *bkt5* strain was generated by transforming *C. reinhardtii* UVM4 strain with PsaD\_BKT\_YFP construct (Figure 2). *H. lacustris* cells are presented in green and red phases. Red phase was obtained by high light treatment and nitrogen starvation for 5 days.

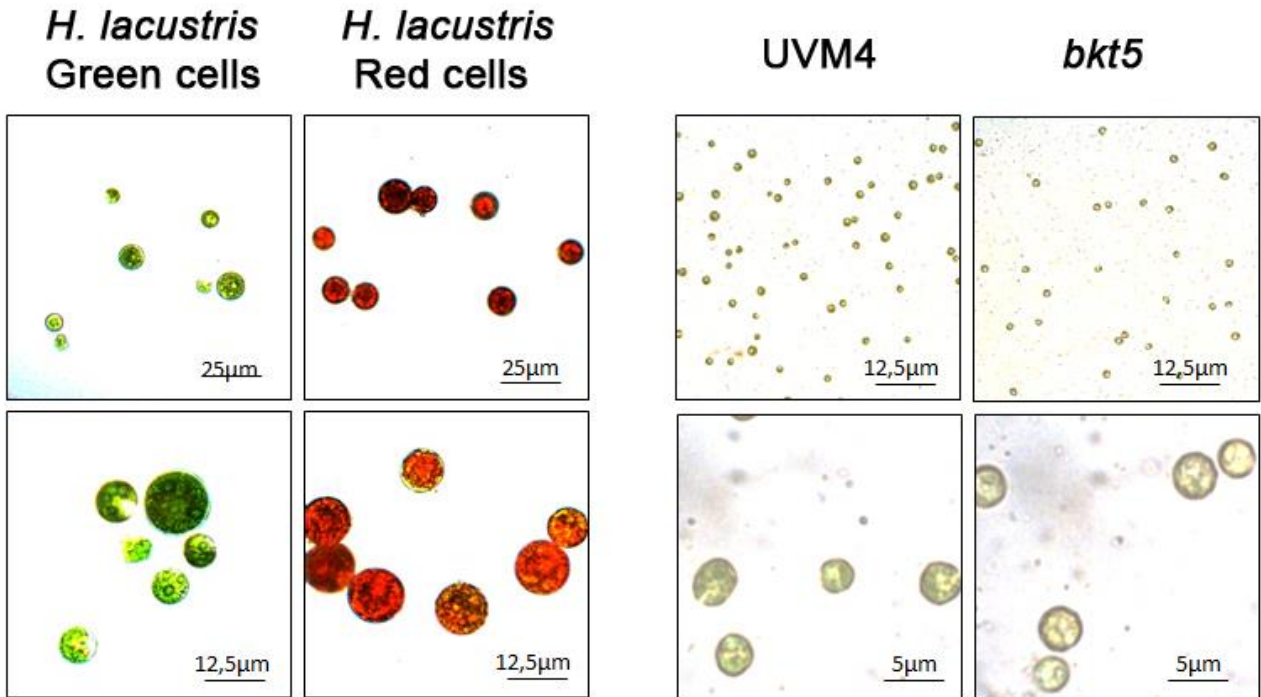

**Figure S3. Mass spectroscopy of ketocarotenoids accumulated in *bkt* strains.** Mass spectra of major ketocarotenoids present in *bkt* mutants. Peak numbers correspond to those present on HPLC chromatogram in Figure 3.

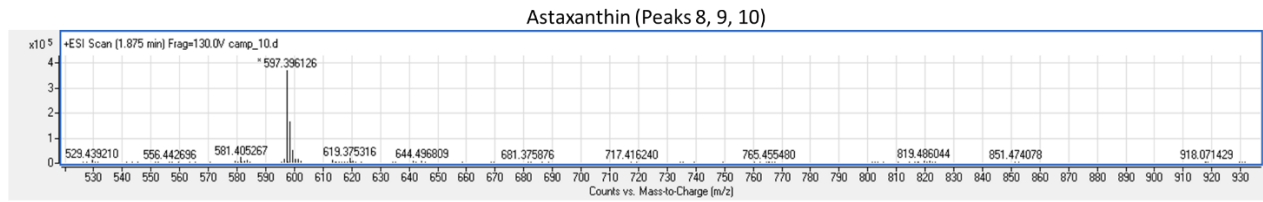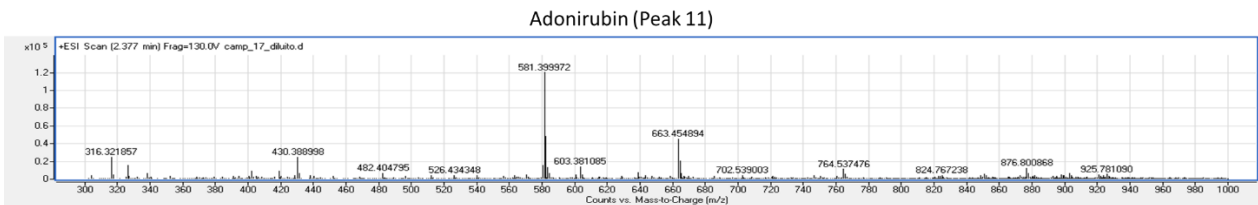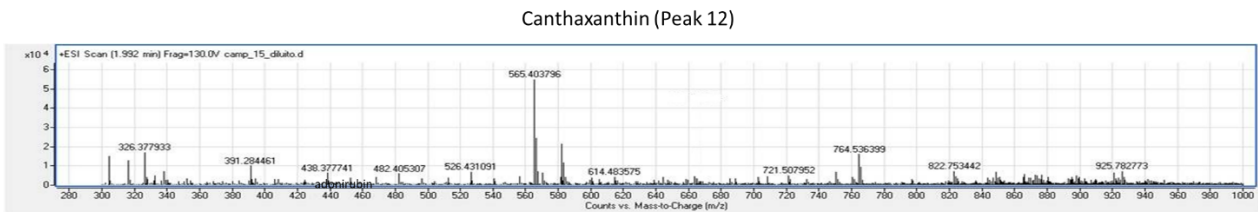

**Figure S4. Absorption spectra of major ketocarotenoids accumulated in *bkt* strains.** Absorbance (a-e) spectra of major ketocarotenoids present in *bkt* mutants resolved by HPLC analysis. Peak numbers correspond to those present on chromatogram in Figure 3

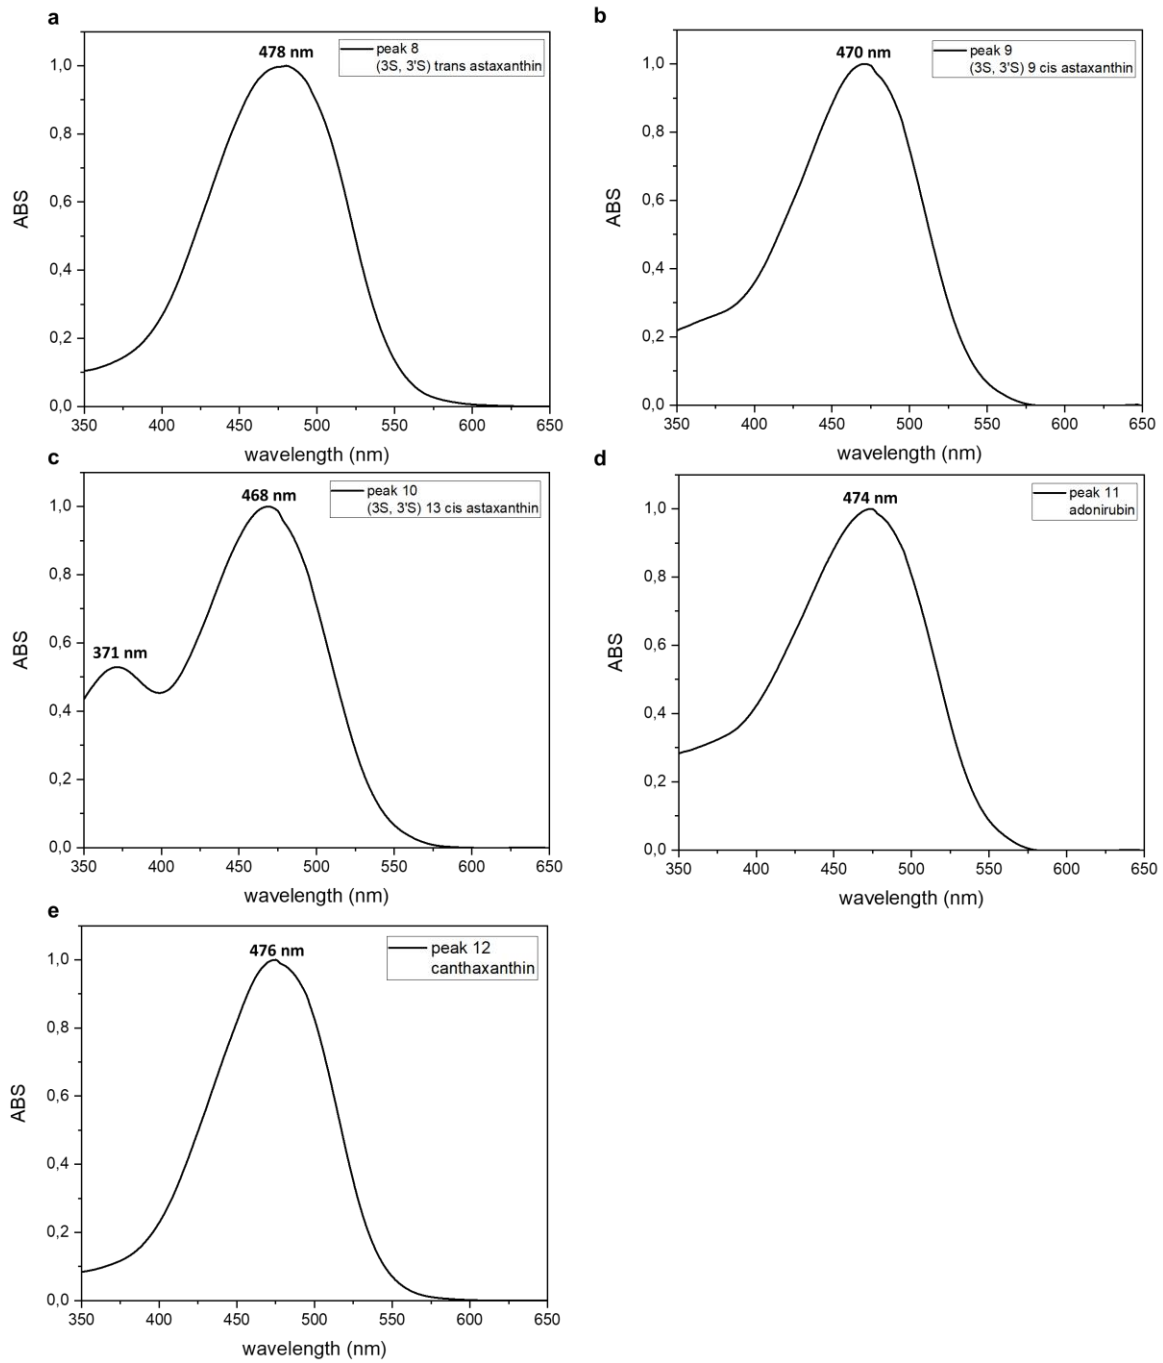

Supplement: PBI-18-2053-s001.pdf [file PBI-18-2053-s001.pdf]
